# Supplementary material
Source: publisher figshare collection journal article supplement (https://rs.figshare.com/ndownloader/files/23890690)
Supplement: Supplementary file 1 [file 23890690]

## Electronic Supplementary Information (ESI)

### Supplementary Methods

#### *Analysis 1: frequency of pollinator limitation*

To measure the frequency of pollinator limitation across all locations for a given crop, we used AIC to choose between three models that relate the number of pollinators observed to our crop-specific yield or production variable (see Fig. 1): 1) a linear positive relationship, implying that all locations were pollination-limited, 2) no relationship (an intercept only model), implying that no locations were limited, or 3) an asymptotic (piecewise) regression model in which production increases with visitation to a certain visit rate breakpoint, then remains flat, implying that the crop is pollination-limited in some locations and not others. If the third model was selected, we estimated the frequency of pollinator limitation as the fraction of locations falling below the breakpoint.

For all models, we used the transect as the unit of analysis for the flower visitation-yield relationship, because this was the most highly resolved scale at which observations of visitation and subsequent production measurements could be paired. In principle, within a given crop in our study, pollination could be limiting at all transects, at a subset of transects, or at no transects. Linear regressions and intercept-only models were performed using the `glm()` function in R version 3.3.2 (R Core Team 2016). Piecewise regressions were performed using the `segmented()` function in the `segmented` package (Muggeo 2003, 2008) in R. The breakpoint between the linear and intercept-only portions of the curve was not specified beforehand, but was estimated automatically by the `segmented()` function to maximize the model fit. For this analysis, we selected the model with the lowest AIC, even in cases where another model was close, because the different structure of the three models meant model averaging would not be appropriate. Tart cherry in Pennsylvania was not included in this analysis due to insufficient data. Investigation of temporal effects in pollinator limitation is beyond the scope of this manuscript. It should also be noted that site and cultivar are necessarily confounded in this analysis because a large number of cultivars are grown for many of our crops, and because cultivar must be matched to the environmental conditions at a given farm. From our perspective this is not necessarily undesirable because we simply intended our data to be a representative sample of what exists in each growing region, and did not intend to make inferences about particular cultivars. Our goal was to make our sample as representative as possible by spreading sampling over many locations in each region.

All crop regions were analyzed separately except for northern highbush blueberry (i.e. transects from British Columbia, Michigan, and Oregon), where the data from all three regions was pooled together in order to extend the range of bee visitation values on the x-axis as widely as possible, given that transects with low bee visitation were only present in British Columbia (Fig. S6). We felt this was appropriate given that our sampling methods were exactly the same across all three regions and that all bushes were of the same cultivar (Bluecrop), and because estimation across the full range of visitation values should result in a more reliable breakpoint value than if each dataset were analyzed separately. Results for each blueberry region analyzed separately are reported in Supplementary analysis 2. The Florida blueberry dataset was not combined with the other regions because it is a different species (southern highbush blueberry).

For blueberry in all four regions, as a check on the patterns of pollinator limitation suggested by our analysis, we performed an additional parallel analysis using the data from hand-pollination

experiments. These experiments were performed in the same transects where open-pollinated bushes were measured, such that each transect had individual measurements for open, bagged, and hand-pollinated bushes. The results of this analysis are reported in Supplementary analysis 3.

#### *Analysis 2: contribution of honey bees versus wild bees*

For each crop, the fraction of total pollen grains deposited by honey bees and each species group of wild bee was estimated by multiplying flower visits by that group with an estimate of relative pollen grains deposited per visit (pollinator efficiency), then dividing by the total to give a proportion:

$$P_{\text{pollinator}} = \frac{R_{\text{pollinator}} \cdot E_{\text{pollinator}}}{\sum (R_{\text{pollinator}} \cdot E_{\text{pollinator}})} \quad (\text{S1})$$

where  $P_{\text{pollinator}}$  is the proportion of pollen grains deposited by each pollinator group,  $R_{\text{pollinator}}$  is the visitation rate (expressed as a proportion of total observed visits contributed by a given pollinator group), and  $E_{\text{pollinator}}$  is the number of pollen grains deposited per visit (by that pollinator group; expressed as a fraction of pollen grains deposited by the honey bee). Table S1 illustrates these calculations for one of our study systems.

**Table S1.** An example of pollinator contribution calculations based on Florida watermelon.

| pollinator | R      | E    | R x E | P     |
|------------|--------|------|-------|-------|
| Honey_bee  | 0.561  | 1.0  | 0.561 | 0.480 |
| Tiny_bee   | 0.287  | 1.2  | 0.344 | 0.295 |
| Green_bee  | 0.102  | 1.1  | 0.112 | 0.096 |
| Bumble_bee | 0.029  | 3.6  | 0.104 | 0.089 |
| Large_bee  | 0.010  | 0.9  | 0.009 | 0.008 |
| Small_bee  | 0.009  | 2.0  | 0.018 | 0.015 |
| Xylocopa   | 0.002  | 12.1 | 0.019 | 0.017 |
| Megachilid | 0.0004 | 1.4  | 0.001 | 0.000 |
| sum        | 1      |      | 1.169 | 1     |

Values of E (pollinator efficiency, i.e., pollen deposition per visit) were taken from the following literature sources (see Table S2): watermelon (Winfree et al. 2007, Winfree et al. 2015), pumpkin (Artz and Nault 2011), almond (Thomson and Goodell 2001), apple (Park et al. 2016), and blueberry (Javorek et al. 2002, Benjamin et al. 2014). Values of E for the wild bee groups were expressed as relative to the E of the honey bee for comparative purposes. For bee species with no available PPV estimates in the literature, we assumed that E was the same as for the honey bee in order to create a conservative estimate of the differences between honey bee and wild bees. No PPV estimates for tart cherry were available in the literature, so the values for sweet cherry (Eeraerts et al. 2019) were substituted.

#### *Analysis 3: Economic valuation*

There are multiple methods for valuing pollination services and these vary in their assumptions and data

requirements (Winfree et al. 2011, Melathopoulos et al. 2015, Hanley et al. 2015, Breeze et al. 2016). Most studies to date have used the production value method, which starts with the total value of the crop yield and multiplies it by the fraction of total yield that would be lost if pollinators were completely absent (Gallai et al. 2009, Calderone 2012). We used the production value method in order to make our results comparable to previous studies that have calculated the value of honey bee and/or wild bee pollination (Losey and Vaughn 2006, Morse and Calderone 2000). Another potential valuation method is the replacement value method, which values the cost of substituting native pollinators with additional honey bees (e.g. Winfree et al. 2011) or hand pollination (Allsopp et al. 2008). Replacement with honey bees is not relevant for our study, as the value contribution of honey bees is one of our measurements of interest. Furthermore, our analysis is best interpreted over a relatively short time scale over which large-scale economic factors remain constant, and the future development of mechanical pollination technologies is not relevant.

Using the production value method, the economic value delivered to each crop in each state was calculated for wild pollinators and honey bees using the following equation, as described in the main text (as equation 1):

$$V_{pollinator} = V_{crop} \cdot D \cdot P_{pollinator} \quad (S2)$$

Where  $V_{pollinator}$  is the annual economic value attributable to a particular pollinator group (either wild bees or honey bee),  $V_{crop}$  is the annual production value of the crop,  $D$  is the pollinator dependency value for the crop (the proportion by which yield is reduced in the absence of pollination; from Klein et al. 2007), and  $P_{pollinator}$  is the fraction of total pollination of the crop provided by the pollinator group. Production values for each crop-state combination (from 2013-2015) were obtained from the USDA-NASS database (USDA-NASS 2017). It is important to note that there remains considerable uncertainty in this equation. For instance, the data used by Klein et al. (2007) to specify pollinator dependency values do not account for some factors that affect pollinator dependence and may differ by farm, such as the crop cultivar used.

As discussed in the main text, our approach updates previous national-scale estimates of the value of wild and honey bee pollination (Losey and Vaughn 2006, Calderone 2012) by incorporating both relative visitation rates and per-visit efficiency by each pollinator group, and by using sites that were within the main production regions for the crop.

To extrapolate our state values up to the national level, we followed two steps. First, we needed to estimate the fraction of total pollination for each crop attributable to each pollinator group at the national level ( $P_{pollinator,US}$ ). These fractions were calculated using the proportion of pollination done by each pollinator group ( $P_{pollinator}$ ) and the value of each crop ( $V_{crop}$ ), both at the state level.

$$P_{pollinator,US} = \sum \left[ P_{pollinator,i} \cdot \frac{V_{crop,i}}{\sum V_{crop,i}} \right] \quad (S3)$$

Equation S3 estimates the national value of each type of pollinator by averaging the values  $P_{\text{pollinator}}$  for each available state  $i$ , weighted by the proportion of the national production of that crop that comes from that state  $\left(\frac{V_{\text{crop},i}}{\sum V_{\text{crop},i}}\right)$ . If only one state was studied for a given crop (e.g. almond), then no averaging was done.

Lastly, we calculated the total production value attributable to each pollinator group at the national level by substituting our fractions from equation S3, along with national-scale crop values, into equation S2, such that

$$V_{\text{pollinator},US} = V_{\text{crop},US} \cdot D \cdot P_{\text{pollinator},US} \quad (\text{S4})$$

where  $V_{\text{crop},US}$  is the total national production value for that crop and  $P_{\text{pollinator},US}$  is the fraction of pollen deposited by the pollinator group. Total production values for each crop at national scale (from 2013-2015) were obtained from the USDA-NASS database (USDA-NASS 2017).

The value  $V_{\text{crop}}$  represents the gross production value of the crop. There is a potential for this value to result in an overestimate of the value of pollinators, because if pollination failed farmers might be able to mitigate financial losses by reducing input costs (i.e. variable costs of production), or potentially adopting alternative pollination strategies. Most of the crops we studied, however, were woody perennials (trees and shrubs) for which the variable costs of production, such as irrigation, fertilizer, and pest management, would still be needed in order to maintain plant health for future production. A sensitivity analysis on the effect of subtracting the variable input costs from the production value estimates (Winfree et al. 2011) is described below. Estimates referenced by each of the equations above are provided in Table S11.

### Supplementary analysis 1: The effect of subtracting variable costs from crop production values

In the event that crops fail due to a lack of pollination, farmers can potentially save money by abandoning expenditures that will no longer create a benefit. Such expenses are often referred to as variable costs of production, because they can vary depending on how much yield is expected or produced. For instance, harvest costs (an important variable cost) can decline to zero if there is no crop to harvest. However, as discussed above, farm management is a complex business, so some variable costs will not be entirely eliminated and hence subtracting the sum of variable costs as we do below will likely result in an underestimate of pollinator value.

The total variable cost associated with the production of a particular crop across the entire USA  $TVC_{US}$  is calculated as

$$TVC_{US} = \sum \left[ VCA_i \cdot \frac{A_i}{\sum A_i} \right] \cdot A_{US} \quad (\text{S5})$$



where  $VCA_i$  is the variable cost per acre for a state  $i$  (one of the states in our study), and where  $A_i$  is the number of acres under production for that state, and  $A_{US}$  is the total area under production of that crop in the USA. The variable input cost estimates used for each crop and state were calculated using sample budgets published by the university cooperative extension program that was the geographically closest to our study farms (see Table S8). Our objective was to create a mean cost per acre for the USA from a weighted average of the states for which data were available. If only one state was studied for a given crop (e.g. almond), then no averaging was done. For states where we had no bee visitation data or variable cost estimates, we assumed that the situation was similar enough to be approximated by the states where we did have data.

The net production value of a particular crop at the national scale,  $NPV_{US}$ , is calculated as

$$NPV_{US} = TPV_{US} - TVC_{US} \quad (S6)$$

where  $TPV_{US}$  is the total (gross) production value at the national scale, and  $TVC$  is the extrapolated total variable cost from above. Total production values and total acres bearing at the state and national level for 2013-2015 were obtained from the USDA-NASS database (USDA-NASS 2017). The quantity  $TPV_{US}$  is equivalent to the quantity  $V_{crop,US}$  from equation S4 above.

The fraction of total pollination of each crop nationwide that is attributable to each pollinator group  $P_{pollinator,US}$  was calculated as

$$P_{pollinator,US} = \sum \left[ P_{pollinator,i} \cdot \frac{NPV_{crop,i}}{\sum NPV_{crop,i}} \right] \quad (S7)$$

an average of the values  $P_i$  for each available state, weighted by the relative net production values  $NPV_i$  calculated for that state. This matches equation S3 above, but now with net production value substituted for total production value.

Lastly, we calculated the net production value attributable to each pollinator group at the national level by substituting our fractions from equation S7 into equation S2 where  $V_{crop}$  is now the net national production value  $NPV_{US}$  for that crop from equation S6.

$$V_{pollinator,US} = NPV_{US} \cdot D \cdot P_{pollinator,US} \quad (S8)$$

Result: As a percentage of gross production value, variable input costs averaged 62% (range 29-87%) across the crop-state combinations in our study (Table S8), often leaving less than half of gross production value to be attributed to pollinators. Nevertheless, the remaining net value represented a very large amount at the scale of the state or nation, especially for the higher value crops such as almond and apple. Results of this analysis compared with the version from the main text where variable costs were not subtracted are summarized in Fig. S5.

Our estimates of wild bee pollination value for the USA were higher than previous studies in four of the seven crops studied, and within the range of previous studies in the other 3 crops (Fig. 4). If all of the variable costs were subtracted (see Fig. S5), these higher estimates would persist in only one crop (apple), and three crops would show lower values than previous estimates because on average, subtracting variable production costs would reduce our estimated values by about 70%. Our higher valuations for wild bees were driven by both higher rates of flower visitation and higher pollen deposition per visit compared with the numbers used in previous studies (Losey and Vaughn 2006). Correspondingly, our valuation for honey bees was often lower (four of the crops) than estimated by previous studies and would have been even further reduced if we had subtracted variable production costs.

### **Supplementary analysis 2: Analysis of the frequency of pollinator limitation for separate regions of northern blueberry.**

When the three regions of northern highbush blueberry were analyzed separately, the segmented model was only clearly preferred by AIC in the British Columbia data ( $\Delta AIC=8.7$ ). A linear increasing model was slightly preferred over a segmented model for Oregon ( $\Delta AIC = 1.4$ ) and Michigan ( $\Delta AIC=0.6$ ), but the slopes of these increasing relationships were very shallow. Breakpoints for the separately analyzed regions were 14.4 bees/10 min (BC), 26.7 bees/10 min (MI), and 43.4 bees/min (OR), compared with an estimated breakpoint of 26.3 bees/10 min when analyzed together. Taken together, these results appear reasonably consistent with the results of the main analysis, and reinforce our decision to combine the three regions.

### **Supplementary analysis 3: Assessing the frequency of pollen limitation using hand pollination experiments in blueberry**

For blueberry in British Columbia, Michigan, Oregon, and Florida, we collected crop production data from plants in each transect that had been pollinated by hand, in addition to the plants used in the main analysis that were either open-pollinated or bagged. For these plants, we added pollen to open clusters of flowers multiple times during bloom to ensure maximum pollination. Thus, the pollen we added was in addition to any pollen provided by bees. If pollination were limiting, we would expect hand-pollinated plants to have higher average berry weight than open-pollinated plants. To analyze the frequency of limitation across farms, we followed the same methods described for the main analysis of pollinator limitation, but with a new crop production variable: the difference in average berry weight between hand- and open-pollinated bushes. For this variable, a larger value would represent a larger effect of hand pollination, and thus potentially lower bee visitation. As before, three models were compared by AIC: 1) a linear relationship between bee visitation and the effect of hand pollination, 2) no relationship, and 3) a segmented relationship in which the effect of hand pollination declines with increased bee visitation to a breakpoint, then remains flat.

Result: As in the main analysis, the segmented relationship was strongly preferred by AIC over the linear relationship ( $\Delta AIC = 19.1$ ) and no relationship models ( $\Delta AIC = 52.3$ ) for northern blueberry (OR, MI, BC) (see Fig. S7). Also consistent with the main analysis, the no relationship model was slightly preferred for southern highbush blueberry in Florida ( $\Delta AIC = 1.7$ ). For northern highbush blueberry, the estimated breakpoint occurred at a somewhat lower value of bee visitation than we found in the main analysis (16.7 bees/10 min compared to 26.3 bees/10 min). This discrepancy may be related to a greater difficulty in detecting differences in production between open and hand pollinated bushes when more bees are present, because simultaneous limitation by other factors becomes more likely. The lower breakpoint would lead to lower estimates of pollen/pollinator limitation across farms than reported in the main analysis (see Table S9).

### Supplementary References

Artz D, Nault B (2011) Performance of *Apis mellifera*, *Bombus impatiens*, and *Peponapis pruinosa* (Hymenoptera: Apidae) as pollinators of pumpkin. J. Econ. Entomol. 104: 1153-1161.

Breeze T, Gallai N, Garibaldi L, Li X (2016) Economic measures of pollination services: shortcomings and future directions. TREE 31: 927-939.

Benjamin F, Reilly J, Winfree R (2014) Pollinator body size mediates the scale at which land use drives crop pollination services. J. Appl. Ecol. 51: 440-449.

Hanley N, Breeze T, Ellis C, Goulson D (2015) Measuring the economic value of pollination services: principles, evidence and knowledge gaps. Ecosystem Services 14: 124-132.

Homer CG, Dewitz J, Jin S, Xian G, Costello C, Danielson P, Gass L, Funk M, Wickham J, Stehman S, et al. (2020) Conterminous United States land cover change patterns 2001-2016 from the 2016 National Land Cover Database. ISPRS Journal of Photogrammetry and Remote Sensing 162: 184-199.

Javorek S, Mackenzie K, Vander Kloet S (2002) Comparative pollination effectiveness among bees (Hymenoptera: Apoidea) on lowbush blueberry (Ericaceae: *Vaccinium angustifolium*). Ann. Entomol. Soc. Am. 95: 345-51.

Melathopoulos A, Cutler G, Tyedmers P (2015) Where is the value in valuing pollination ecosystem services to agriculture? Ecological Economics 109: 59-70.

Muggeo, VM (2003) Estimating regression models with unknown break-points. Statistics in Medicine, 22, 3055-3071.

Muggeo, VM (2008) segmented: an R Package to Fit Regression Models with Broken-Line Relationships.

R News, 8/1, 20-25. URL <https://cran.r-project.org/doc/Rnews/>.

Park M, Raguso R, Losey J, Danforth B (2016) Per-visit pollinator performance and regional importance of wild *Bombus* and *Andrena* (*Melandrena*) compared to the managed honey bee in New York apple orchards. *Apidologie* 47: 145-160.

R Core Team (2016) R: A language and environment for statistical computing. R Foundation for Statistical Computing, Vienna, Austria. URL <https://www.R-project.org/>.

Thomson J, Goodell K (2001) Pollen removal and deposition by honeybee and bumblebee visitors to apple and almond flowers. *J. Appl. Ecol.* 38: 1032–1044.

USDA-NASS (2017) National Agricultural Statistics Service. United States Department of Agriculture. QuickStats online database: URL <https://quickstats.nass.usda.gov/>.

Winfrey R, Fox J, Williams N, Reilly J, Cariveau D (2015) Abundance of common species, not species richness, drives delivery of a real-world ecosystem service. *Ecology Letters* 18: 626-635.

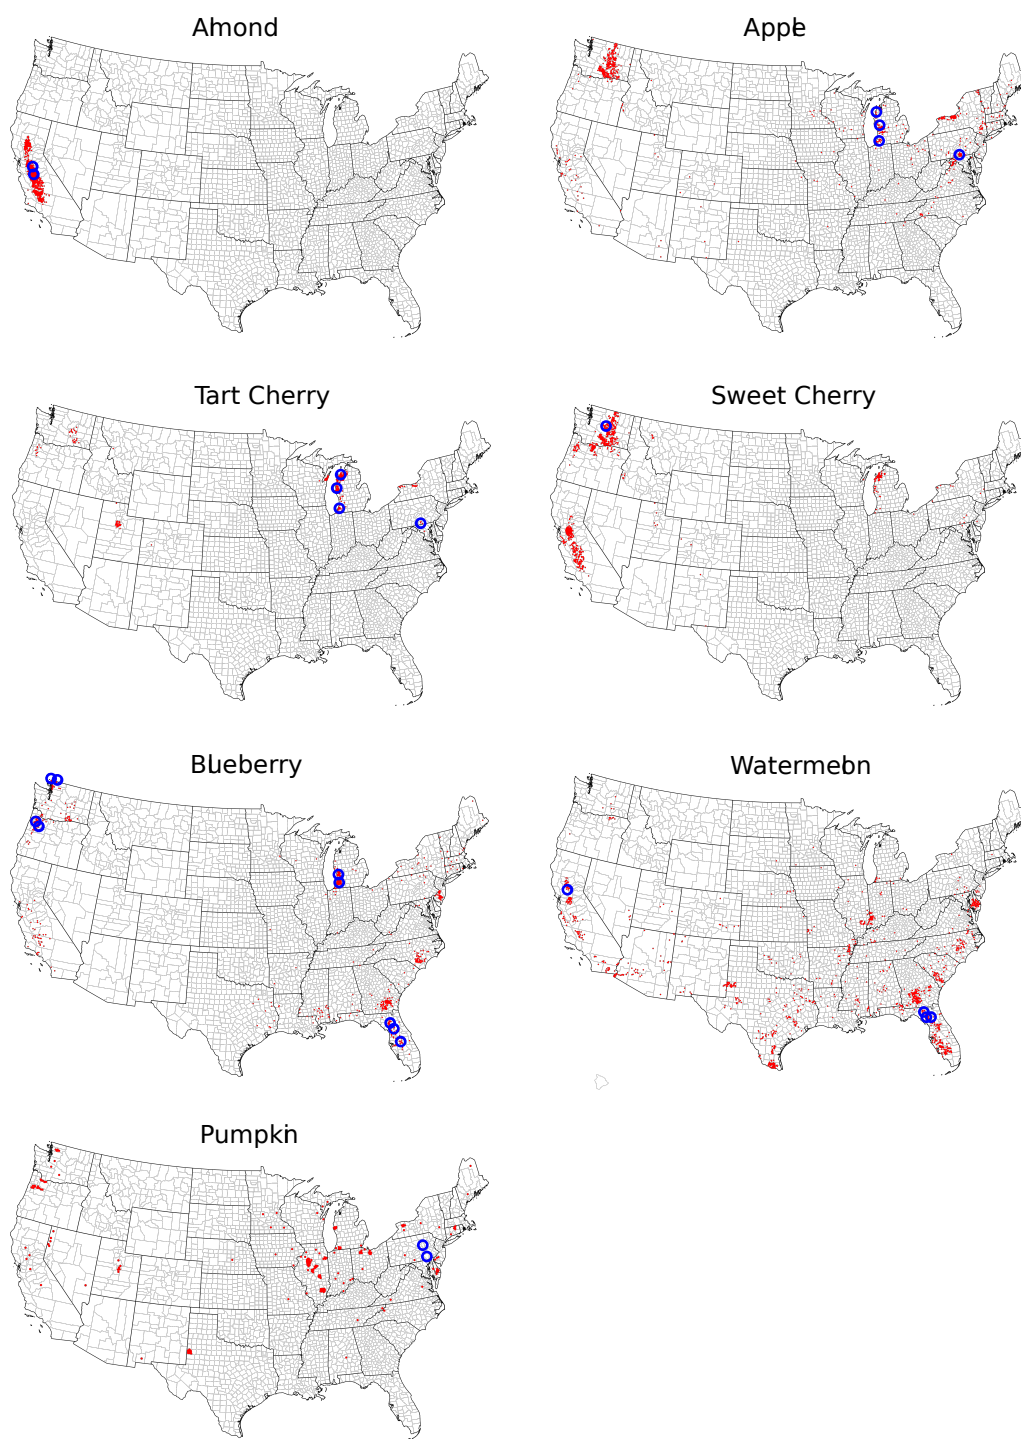

**Figure S1.** Maps showing the location of our study farms with respect to the major production areas for each crop in the United States. Study farms are marked with a blue circle (often, multiple study farms were located within the same county, so in these cases only a single circle was drawn for clarity). Crop-specific maps were based on data provided by the United States Department of Agriculture National Agricultural Statistics Service 2012 Census of Agriculture. Each red dot represents 100 acres of a given crop, except in the case of apple where each dot represents 500 acres and almond where each dot represents 1000 acres.

Figure S2 (page 1/4)

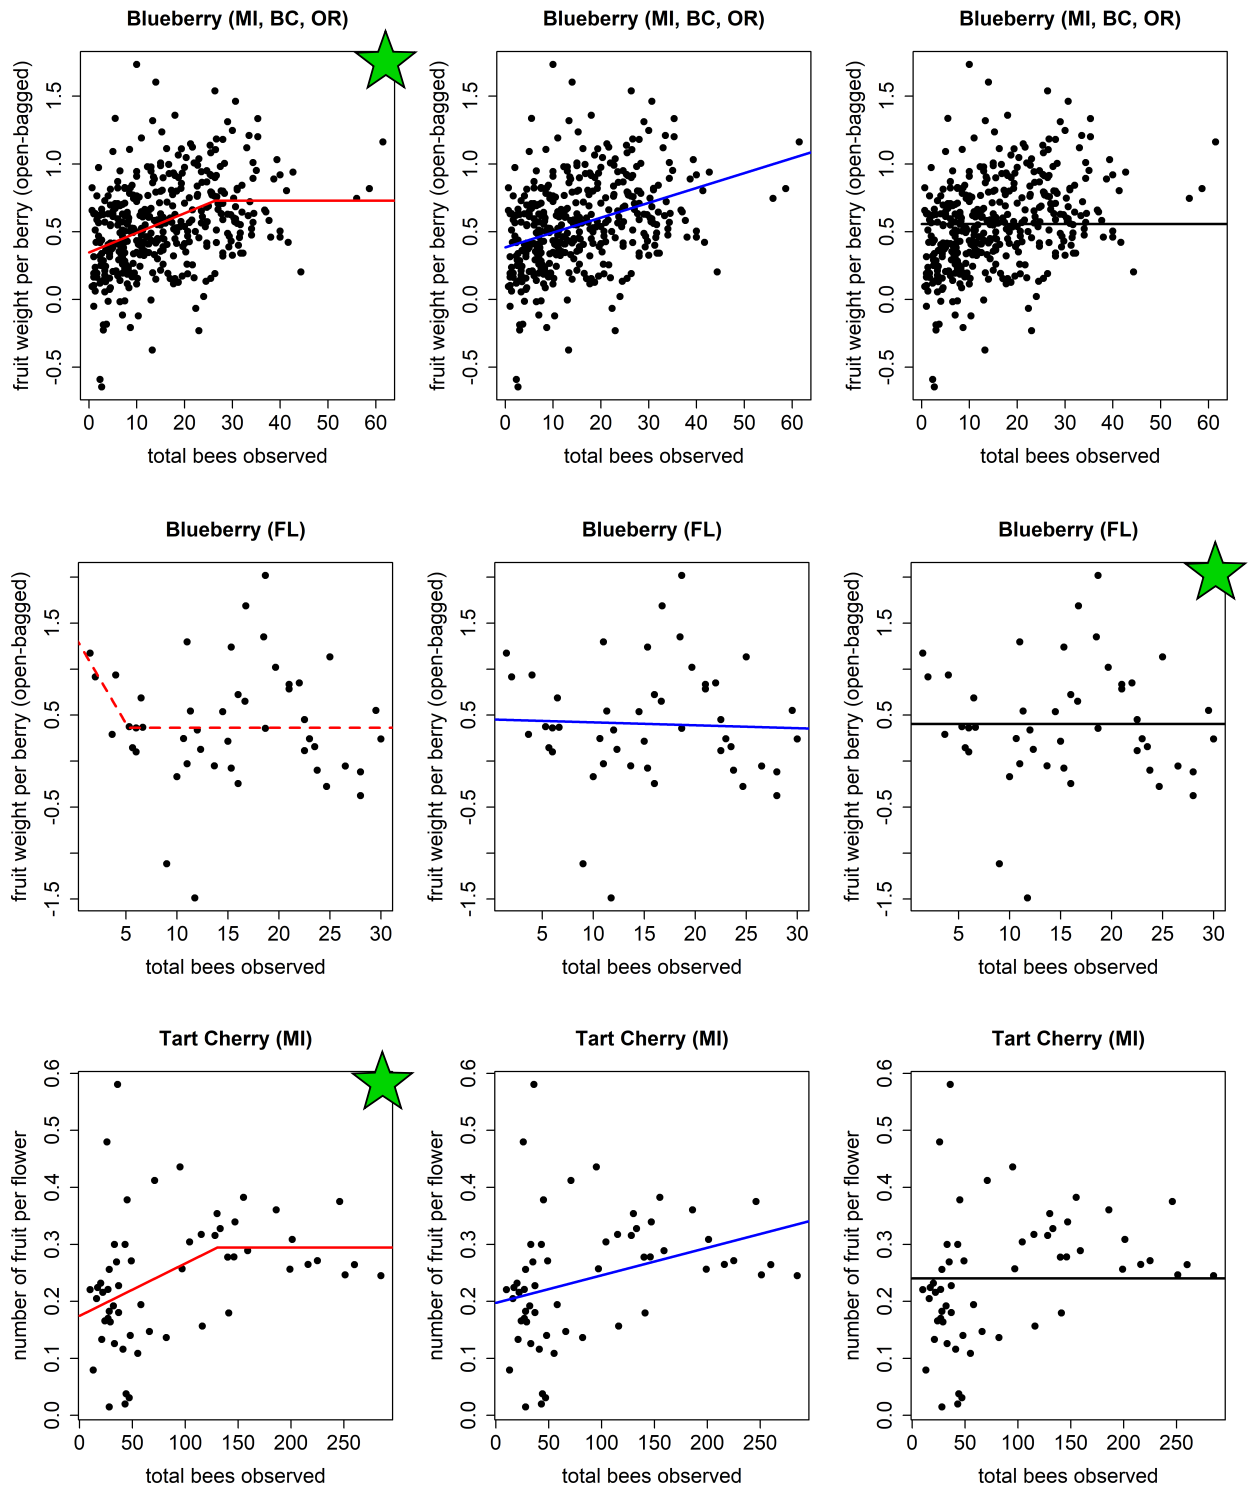

Figure S2 (page 2/4)

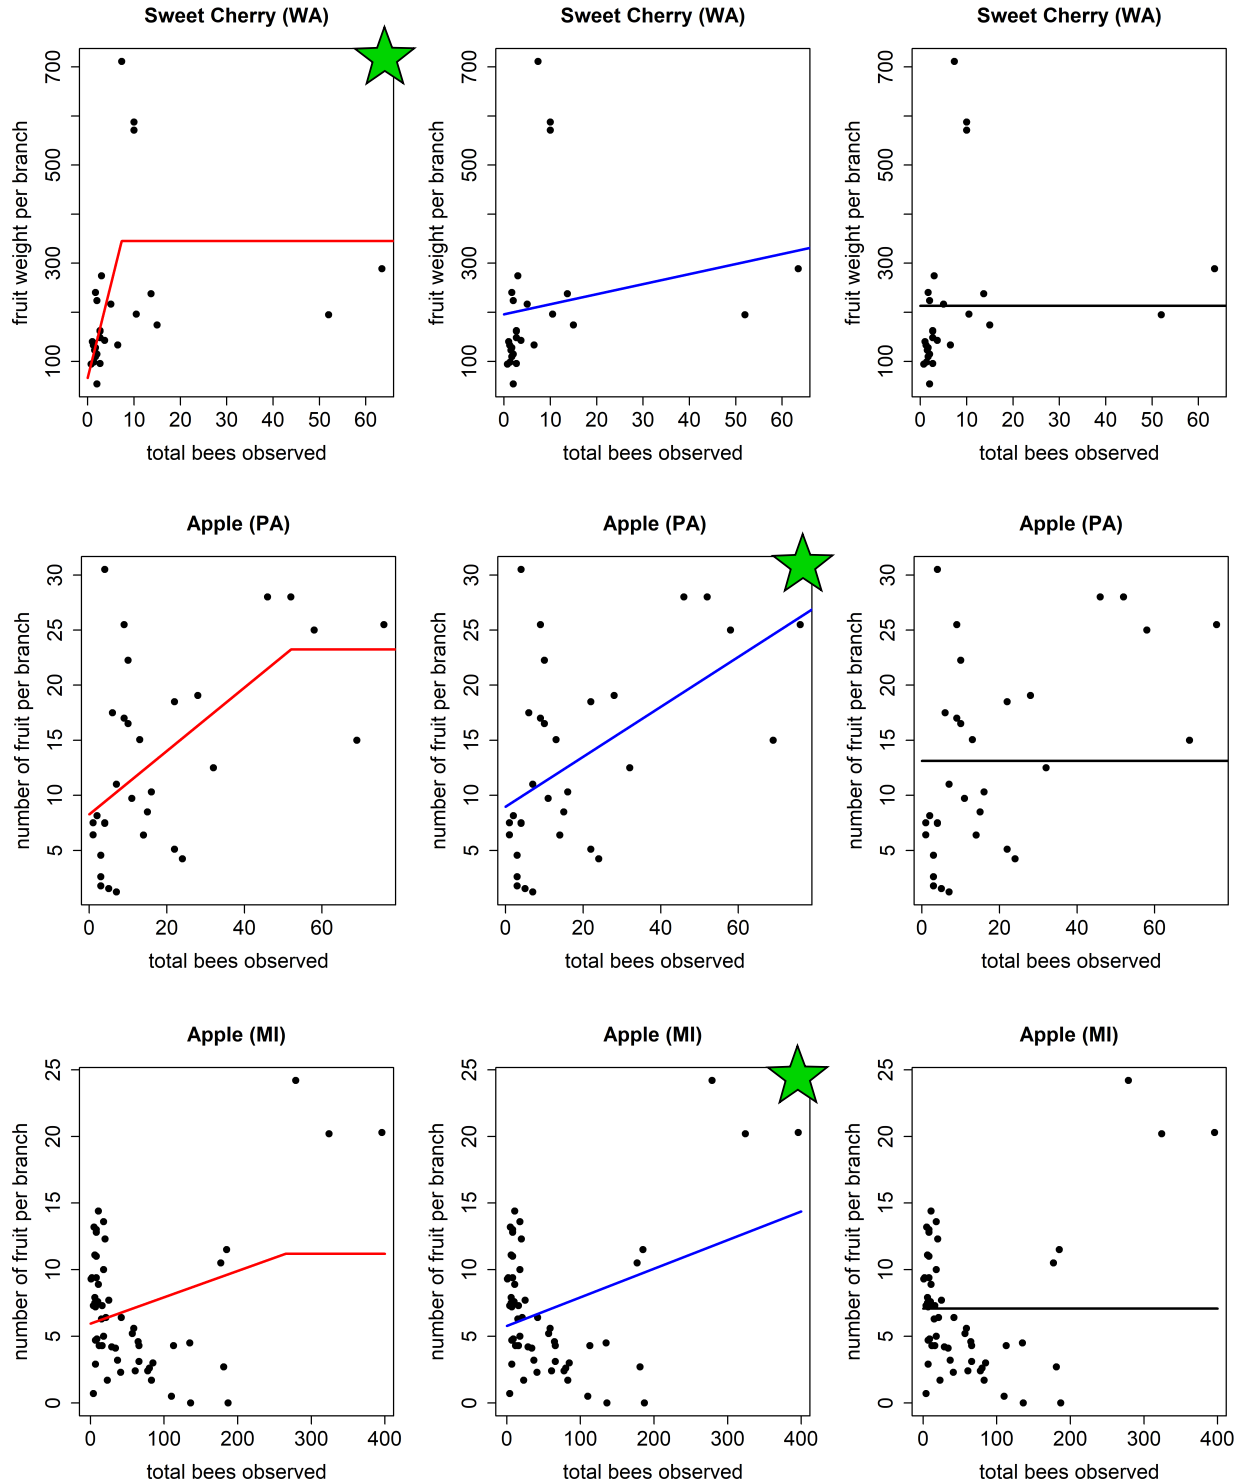

Figure S2 (page 3/4)

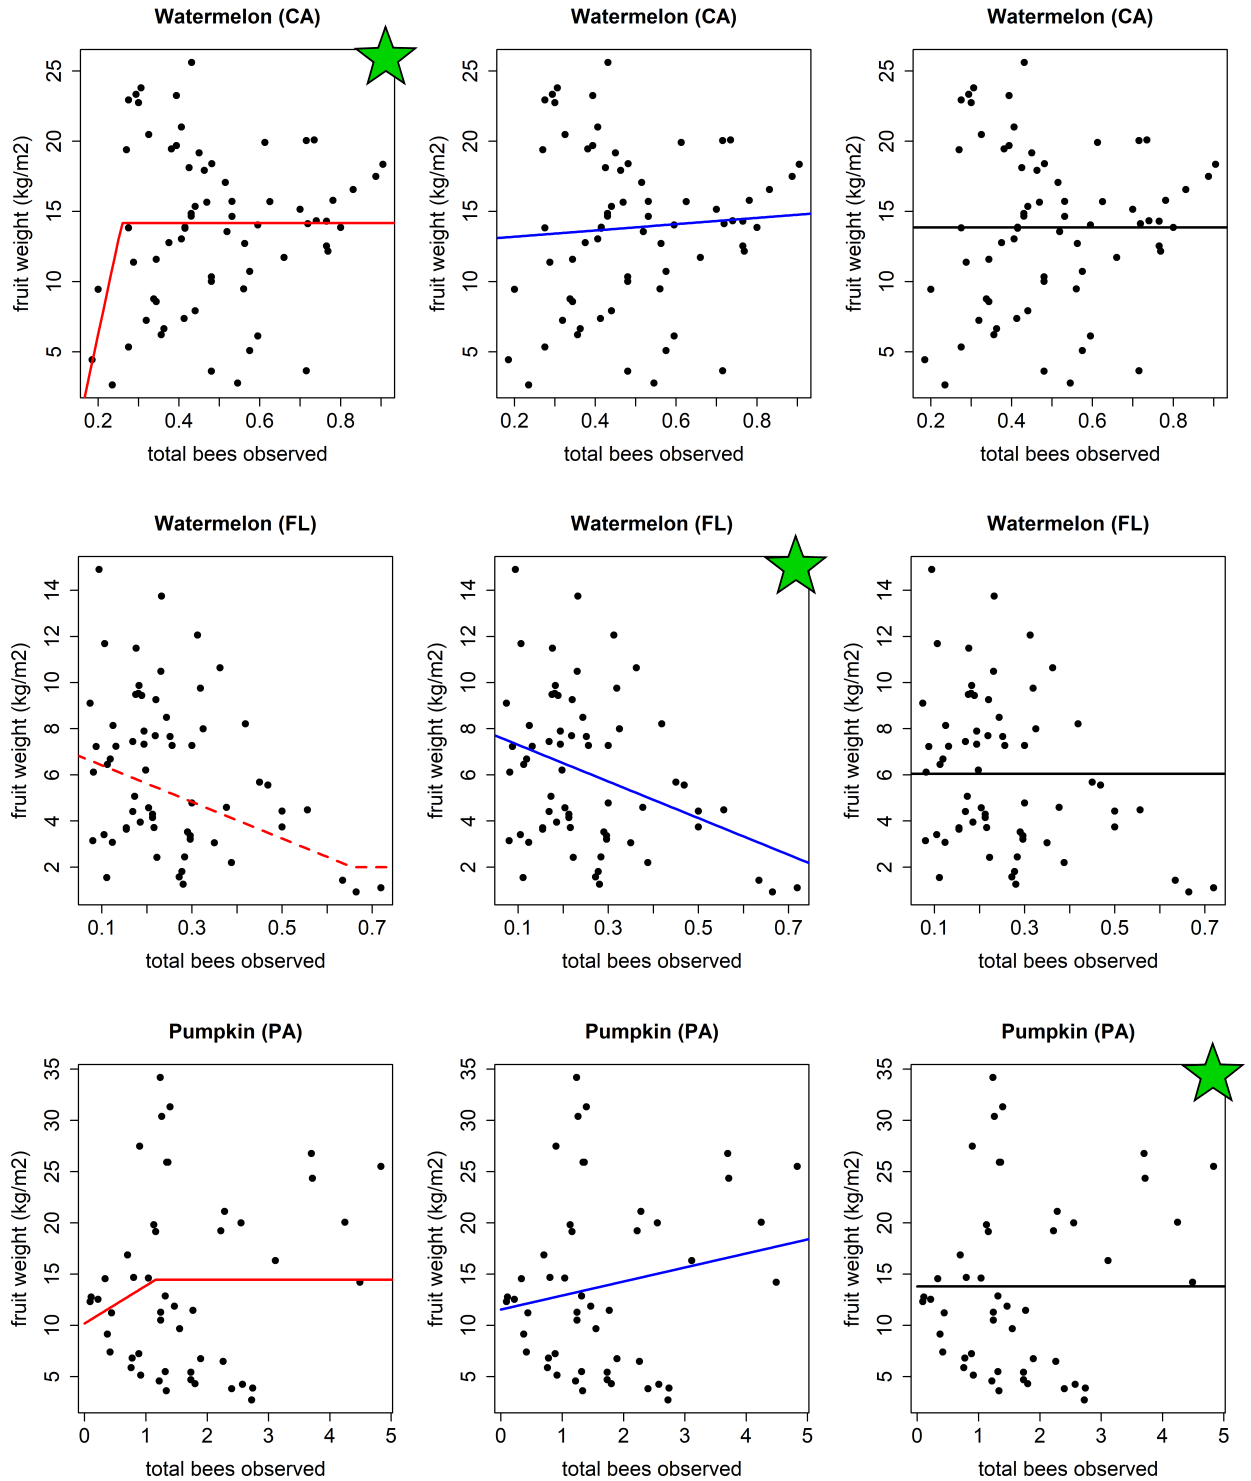



Figure S2 (page 4/4)

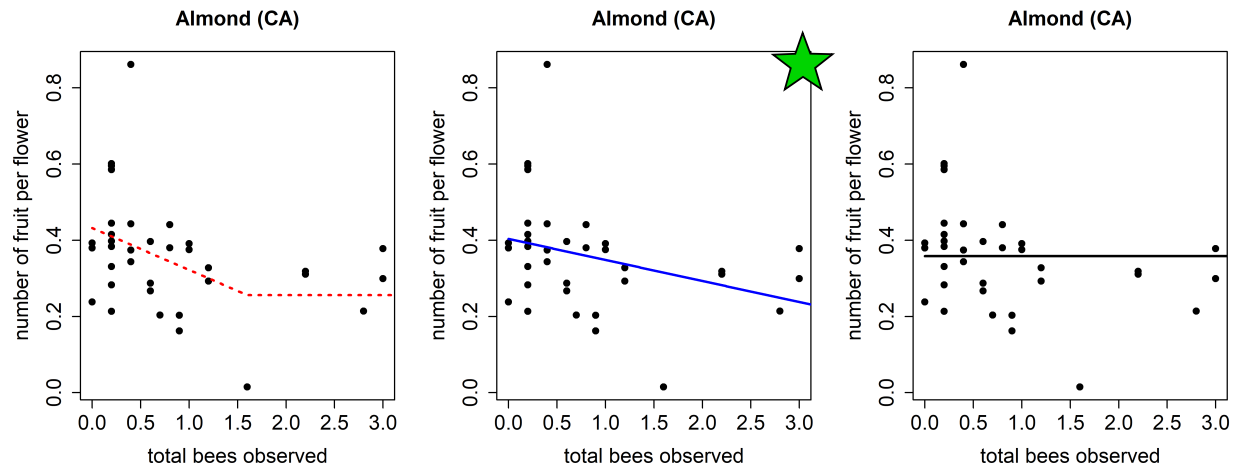

**Figure S2.** Plots of different potential relationships between visits and yield or production for each crop. In each row, the plots correspond to models of a) a segmented relationship between visits and crop production where there is initially a positive relationship, but after an estimated breakpoint there is no relationship, B) a linear relationship between visits and crop production across all sampled locations c) no relationship. AIC model selection was used to select the best model of the three. The green star in the corner denotes which model was selected for a given crop.

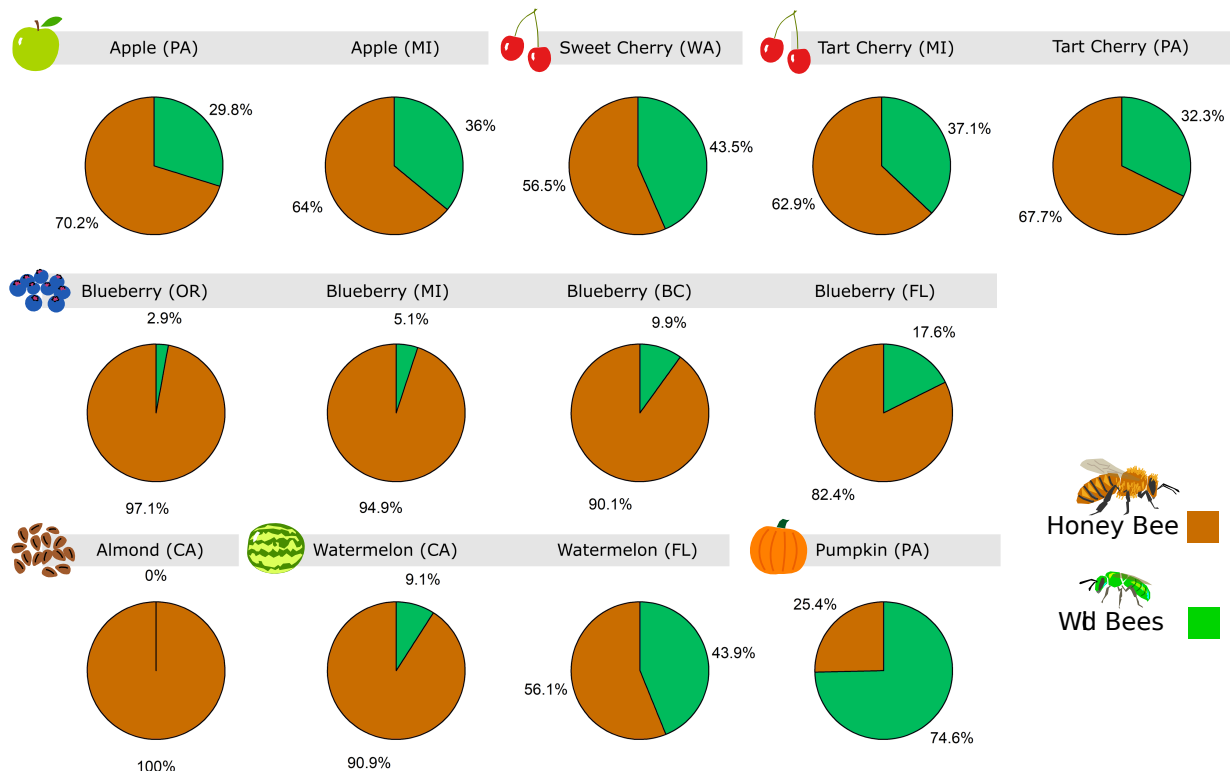

**Figure S3.** Relative visitation rates of honey bees and wild bees across the crop-region combinations in our study. Percentages were calculated by averaging the number of visits by each pollinator across all the farm-years within that crop. The number of farms and years differed by crop (see Table S3).

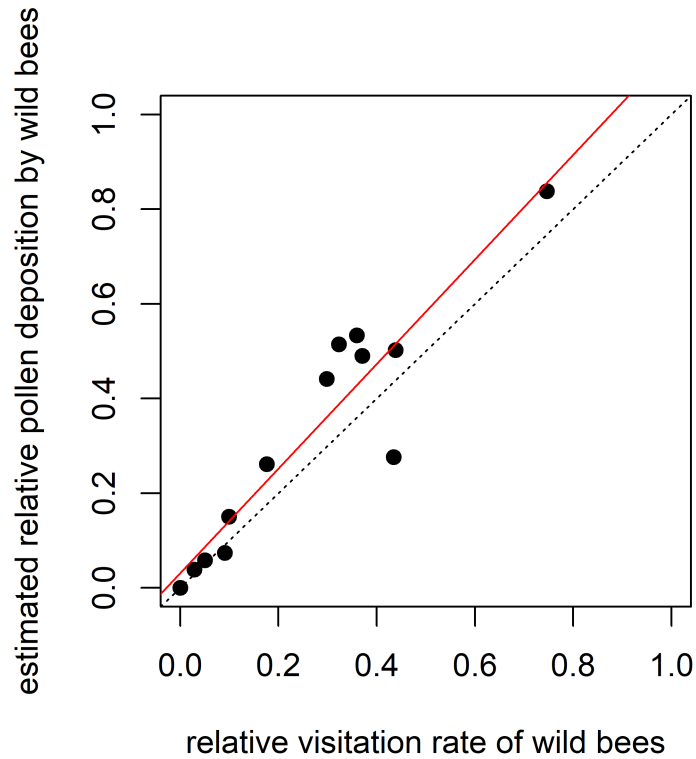

**Figure S4.** Regression between percent of pollen deposition and percent of visitation by wild bees (where the remainder is provided by the honey bee). Each data point is a crop-state combination from our study. ( $R^2=0.87$ ,  $p<0.01$ ) If all bee visits carried the same PPV, the regression would fall along the 1:1 line (dotted). Overall pollen deposition for most crops was somewhat greater than predicted by visit rate alone, hence the regression line (red, slope: 1.10) is somewhat above the 1:1 line. In other words, visitation predicts pollen deposition very well, but there is a positive multiplier of associated with wild bee visitation such that each wild bee visit (on average) results in more pollen deposition than each honey bee visit. The outlier below the line is sweet cherry, where many of the wild bee pollinators were bumble bees (see Table S2) that are not currently thought to be effective pollinators of cherry (Eeraerts et al 2019).

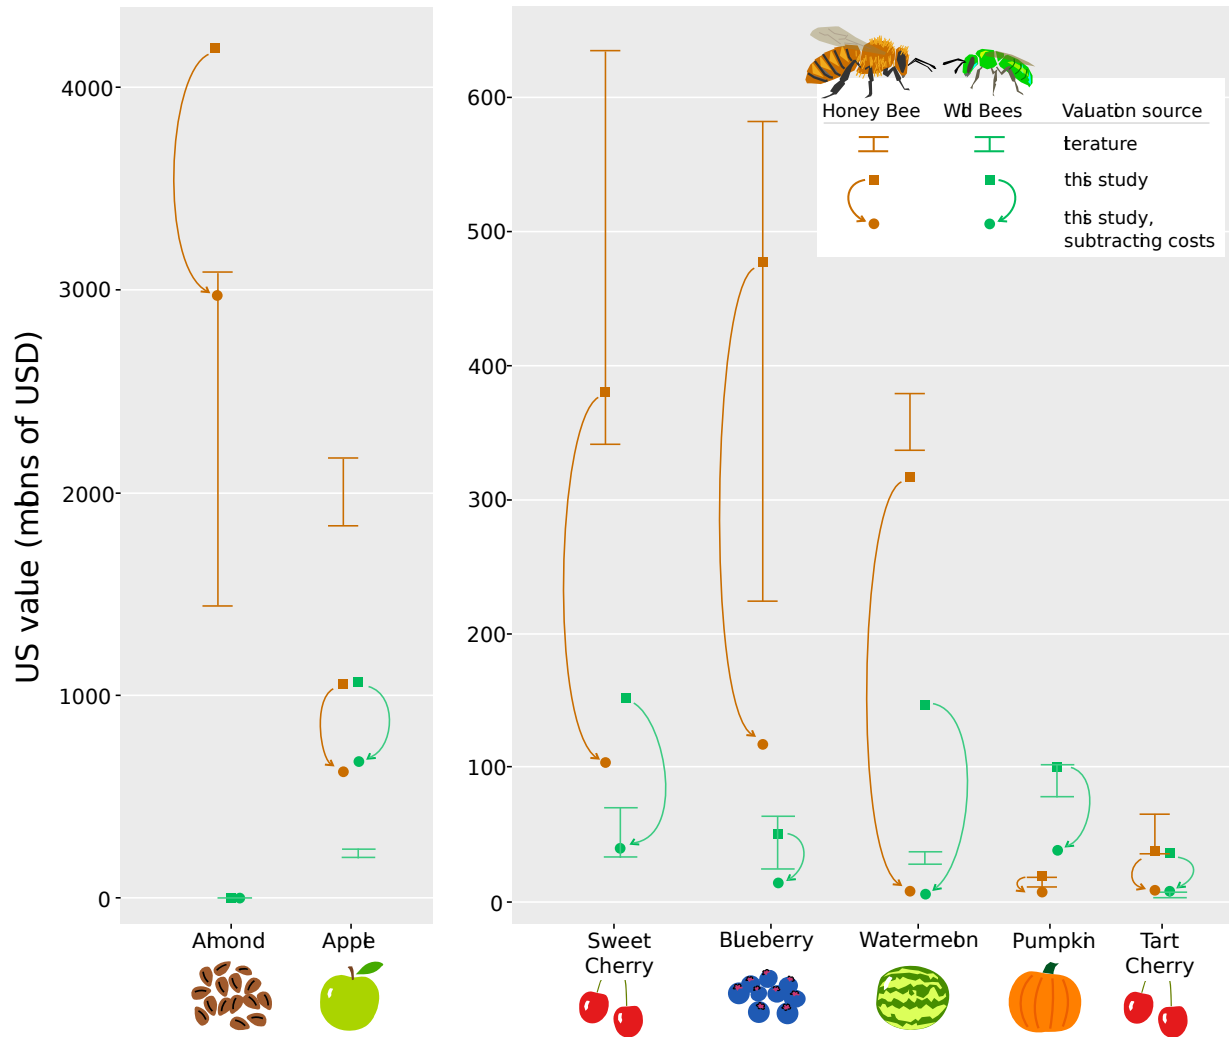

**Figure S5.** Comparison of valuations before and after subtracting variable costs of production. Points represent value estimates for honey bee (orange) and wild bees (green), extrapolated to the level of the United States. Bars encompass the range of estimates in the published literature (Losey and Vaughn 2006 and Calderone 2012). Square points show total value estimates, equivalent to those shown in Fig. 4 of the main text. Circle points show net value estimates, following the methods in this supplementary analysis. Arrows are included to indicate the magnitude and direction of value change as a result of subtracting variable costs. All values have been adjusted to 2015 dollars.

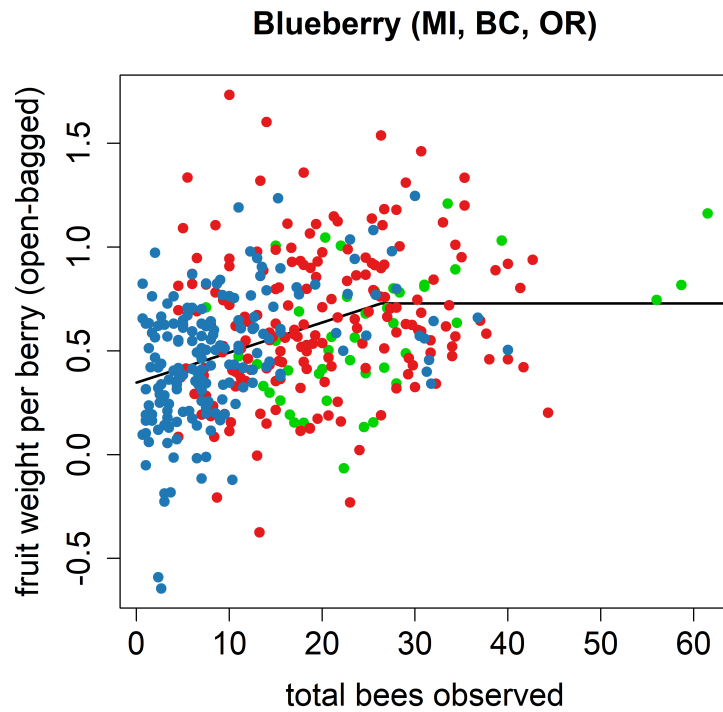

**Figure S6.** Plot of the relationship between visits and crop production for each northern highbush blueberry site (in MI, BC, and OR) showing how the distribution of bee visitation values differs across region. Note that more of the transects with low visitation occur in the British Columbia data (blue), than in the Michigan (red) or Oregon (green) data. For reference, the segmented model relationship as selected in Fig. S2 is plotted in black.

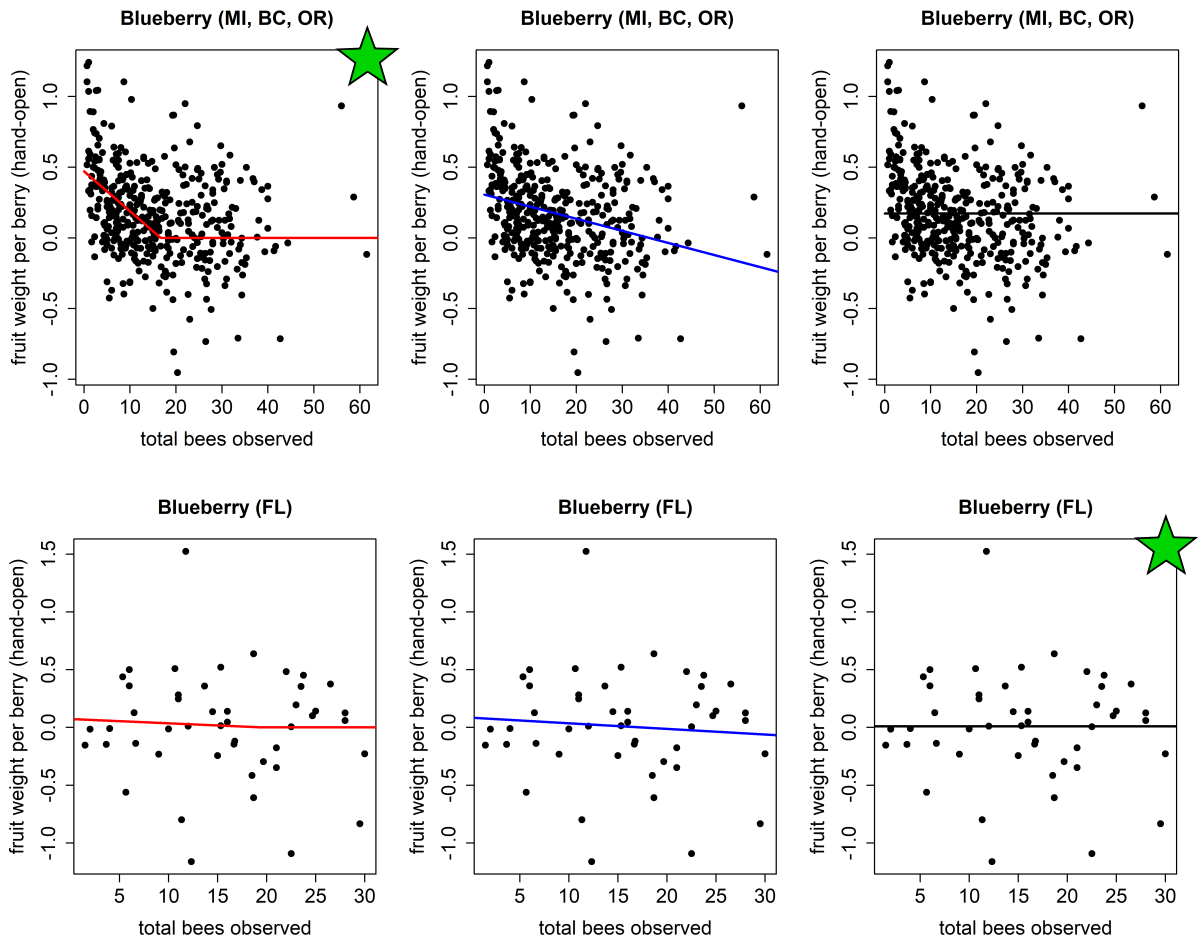

**Figure S7.** Plots of different potential relationships between visits and the effect of hand-pollination for blueberry. In these plots, a larger y-axis value corresponds to more pollen limitation, thus a negative slope indicates pollen limitation across transects (the opposite of Fig. S2). The first row of plots correspond to models for northern highbush blueberry of a) a segmented relationship between visits and the effect of hand pollination where there is initially a negative relationship, but after an estimated breakpoint there is no relationship, b) a linear relationship between visits and the effect of hand pollination across all sampled locations and c) no relationship. The second row shows the results of the same models for southern highbush blueberry (Florida). AIC model selection was used to select the best model of the three. The green star in the corner denotes which model was selected.

**Table S2.** Relative visit rates (% of total visits) by each species group from our study, pollen deposition per visit (PPV) estimates collected from the literature for each species group, and PPV values relative to that of the honey bee (PPV of species group divided by PPV of honey bee).

| species_group        | crop_state    | visits (%) | PPV (pollen grains) | relative PPV | PPV reference (state)    | reference species group (PPV sample size)        |
|----------------------|---------------|------------|---------------------|--------------|--------------------------|--------------------------------------------------|
| honey_bee            | watermelon_fl | 56.1       | 40                  | 1.0          | Winfree et al. 2007 (NJ) | honey_bee (44)                                   |
| tiny_bee             | watermelon_fl | 28.7       | 49                  | 1.2          | Winfree et al. 2015 (NJ) | tiny_dark_bee (33)                               |
| green_bee            | watermelon_fl | 10.2       | 43                  | 1.1          | Winfree et al. 2015 (NJ) | mean of small_green_bee and large_green_bee (54) |
| Bombus               | watermelon_fl | 2.9        | 142                 | 3.6          | Winfree et al. 2015 (NJ) | Bombus (79)                                      |
| large_bee            | watermelon_fl | 1.0        | 37                  | 0.9          | Winfree et al. 2015 (NJ) | large_dark_striped_bee (6)                       |
| small_bee            | watermelon_fl | 0.9        | 79                  | 2.0          | Winfree et al. 2015 (NJ) | small_dark_bee (67)                              |
| Xylocopa             | watermelon_fl | 0.2        | 479                 | 12.1         | Winfree et al. 2015 (NJ) | Xylocopa (1)                                     |
| megachilid           | watermelon_fl | 0.04       | 56                  | 1.4          | Winfree et al. 2015 (CA) | Melissodes_megachile_diasia (56)                 |
|                      |               |            |                     |              |                          |                                                  |
| honey_bee            | watermelon_ca | 90.9       | 40                  | 1.0          | Winfree et al. 2007 (NJ) | honey_bee (44)                                   |
| Dialictus_Hylaeus    | watermelon_ca | 6.5        | 19                  | 0.5          | Winfree et al. 2015 (CA) | Lasioglossum_dialictus_hylaeus (66)              |
| Halictus_tripartitus | watermelon_ca | 1.9        | 46                  | 1.2          | Winfree et al. 2015 (CA) | Halictus tripartitus (61)                        |
| Halictus_ligatus     | watermelon_ca | 0.5        | 73                  | 1.8          | Winfree et al. 2015 (CA) | Halictus ligatus (30)                            |
| Anthophora           | watermelon_ca | 0.1        | 275                 | 6.9          | Winfree et al. 2015 (CA) | Anthophora urbana (22)                           |
| Peponapis            | watermelon_ca | 0.04       | 54                  | 1.4          | Winfree et al. 2015 (CA) | Peponapis (39)                                   |
| Melissodes           | watermelon_ca | 0.03       | 56                  | 1.4          | Winfree et al. 2015 (CA) | Melissodes_megachile_diasia (56)                 |
| Tripeolus            | watermelon_ca | 0.02       | 3                   | 0.1          | Winfree et al. 2015 (CA) | Tripeolus (4)                                    |
| other_bee            | watermelon_ca | 0.02       | 185                 | 4.6          | Winfree et al. 2015 (CA) | mean of Lasioglossum_large and Agapostemon (41)  |
|                      |               |            |                     |              |                          |                                                  |
| Bombus               | pumpkin_pa    | 53.5       | 170                 | 2.5          | Artz and Nault 2011 (NY) | Bombus impatiens (20)                            |
| honey_bee            | pumpkin_pa    | 25.4       | 68                  | 1.0          | Artz and Nault 2011 (NY) | Apis mellifera (20)                              |
| squash_bee           | pumpkin_pa    | 17.7       | 63                  | 0.9          | Artz and Nault 2011 (NY) | Peponapis pruinosa (20)                          |

|                   |                 |      |                      |     |                                                      |                                          |
|-------------------|-----------------|------|----------------------|-----|------------------------------------------------------|------------------------------------------|
| small_dark_bee    | pumpkin_pa      | 2.0  | NA                   | 1.0 | no data                                              |                                          |
| green_bee         | pumpkin_pa      | 1.2  | NA                   | 1.0 | no data                                              |                                          |
| small_striped_bee | pumpkin_pa      | 0.3  | NA                   | 1.0 | no data                                              |                                          |
| large_dark_bee    | pumpkin_pa      | 0.04 | NA                   | 1.0 | no data                                              |                                          |
|                   |                 |      |                      |     |                                                      |                                          |
| honey_bee         | cherry_pa       | 67.7 | 15<br>(num<br>fruit) | 1.0 | Eeraerts et al<br>2019 (sweet<br>cherry,<br>Belgium) | Apis mellifera (179)                     |
| other_bee         | cherry_pa       | 27.5 | 58<br>(num<br>fruit) | 3.0 | Eeraerts et al<br>2019 (sweet<br>cherry,<br>Belgium) | solitary and mason bees<br>(231)         |
| Bombus            | cherry_pa       | 4.8  | 0 (num<br>fruit)     | 0   | Eeraerts et al<br>2019 (sweet<br>cherry,<br>Belgium) | Bombus (30)                              |
|                   |                 |      |                      |     |                                                      |                                          |
| honey_bee         | cherry_mi       | 62.9 | 15<br>(num<br>fruit) | 1.0 | Eeraerts et al<br>2019 (sweet<br>cherry,<br>Belgium) | Apis mellifera (179)                     |
| other_bee         | cherry_mi       | 34.1 | 58<br>(num<br>fruit) | 3.0 | Eeraerts et al<br>2019 (sweet<br>cherry,<br>Belgium) | solitary and mason bees<br>(231)         |
| Bombus            | cherry_mi       | 3.0  | 0 (num<br>fruit)     | 0   | Eeraerts et al<br>2019 (sweet<br>cherry,<br>Belgium) | Bombus (30)                              |
|                   |                 |      |                      |     |                                                      |                                          |
| honey_bee         | sweet_cherry_wa | 56.5 | 15<br>(num<br>fruit) | 1.0 | Eeraerts et al<br>2019 (sweet<br>cherry,<br>Belgium) | Apis (179)                               |
| Bombus            | sweet_cherry_wa | 42.6 | 58<br>(num<br>fruit) | 3.0 | Eeraerts et al<br>2019 (sweet<br>cherry,<br>Belgium) | solitary and mason bees<br>(231)         |
| other_bee         | sweet_cherry_wa | 0.8  | 0 (num<br>fruit)     | 0   | Eeraerts et al<br>2019 (sweet<br>cherry,<br>Belgium) | Melandrena (30)                          |
|                   |                 |      |                      |     |                                                      |                                          |
| honey_bee         | blueberry_or    | 97.1 | 12                   | 1.0 | Javorek et al.<br>2002 (NS)                          | Apis mellifera (10)                      |
| other_bee         | blueberry_or    | 1.5  | 11                   | 0.9 | Benjamin et al.<br>2014 (NJ)                         | mean of large and medium<br>Andrena (83) |
| Bombus            | blueberry_or    | 1.3  | 24                   | 2.0 | Benjamin et al.<br>2014 (NJ)                         | Bombus (queen) (80)                      |



|           |              |      |    |     |                             |                                       |
|-----------|--------------|------|----|-----|-----------------------------|---------------------------------------|
|           |              |      |    |     |                             |                                       |
| honey_bee | blueberry_mi | 94.9 | 12 | 1.0 | Javorek et al. 2002 (NS)    | Apis mellifera (10)                   |
| other_bee | blueberry_mi | 3.4  | 11 | 0.9 | Benjamin et al. 2014 (NJ)   | mean of large and medium Andrena (83) |
| Bombus    | blueberry_mi | 1.4  | 24 | 2.0 | Benjamin et al. 2014 (NJ)   | Bombus (queen) (80)                   |
| Xylocopa  | blueberry_mi | 0.2  | 3  | 0.3 | Benjamin et al. 2014 (NJ)   | Xylocopa virginica (34)               |
|           |              |      |    |     |                             |                                       |
| honey_bee | blueberry_fl | 82.4 | 12 | 1.0 | Javorek et al. 2002 (NS)    | Apis mellifera (10)                   |
| Habropoda | blueberry_fl | 8.4  | 28 | 2.3 | Benjamin et al. 2014 (NJ)   | Habropoda laboriosa (38)              |
| Bombus    | blueberry_fl | 7.3  | 24 | 2.0 | Benjamin et al. 2014 (NJ)   | Bombus (queen) (80)                   |
| other_bee | blueberry_fl | 1.2  | 11 | 0.9 | Benjamin et al. 2014 (NJ)   | mean of large and medium Andrena (83) |
| Xylocopa  | blueberry_fl | 0.8  | 3  | 0.3 | Benjamin et al. 2014 (NJ)   | Xylocopa virginica (34)               |
|           |              |      |    |     |                             |                                       |
| honey_bee | blueberry_bc | 90.1 | 12 | 1.0 | Javorek et al. 2002 (NS)    | Apis mellifera (10)                   |
| Bombus    | blueberry_bc | 8.9  | 24 | 2.0 | Benjamin et al. 2014 (NJ)   | Bombus (queen) (80)                   |
| other_bee | blueberry_bc | 1.0  | 11 | 0.9 | Benjamin et al. 2014 (NJ)   | mean of large and medium Andrena (83) |
|           |              |      |    |     |                             |                                       |
| honey_bee | apple_pa     | 70.2 | 34 | 1.0 | Park et al. 2016 (NY)       | Apis (46)                             |
| other_bee | apple_pa     | 25.3 | 73 | 2.5 | Park et al. 2016 (NY)       | Melandrena (33)                       |
| Bombus    | apple_pa     | 4.4  | 51 | 1.5 | Park et al. 2016 (NY)       | Bombus (8)                            |
|           |              |      |    |     |                             |                                       |
| honey_bee | apple_mi     | 64.0 | 34 | 1.0 | Park et al. 2016 (NY)       | Apis (46)                             |
| other_bee | apple_mi     | 31.8 | 73 | 2.5 | Park et al. 2016 (NY)       | Melandrena (33)                       |
| Bombus    | apple_mi     | 4.2  | 51 | 1.5 | Park et al. 2016 (NY)       | Bombus (8)                            |
|           |              |      |    |     |                             |                                       |
| honey_bee | almond_ca    | 100  | 18 | 1.0 | Thomson & Goodell 2001 (CA) | Apis mellifera (16)                   |

**Table S3.** Methods details for bee observations on each crop.

| crop         | state | years            | sites | transects | bee obs<br>dates per<br>year | bee obs<br>times per<br>day | bee obs replicate unit                                                                                                                                     |
|--------------|-------|------------------|-------|-----------|------------------------------|-----------------------------|------------------------------------------------------------------------------------------------------------------------------------------------------------|
| almond       | CA    | 2013, 2014       | 6     | 35        | 1                            | 1                           | 6.7 min (20 sec x 4 areas per tree x 5 trees). The four areas observed on each tree were bottom exterior, bottom interior, top exterior, and top interior. |
| apple        | MI    | 2013, 2014, 2015 | 5     | 57        | 1                            | 1                           | 10 min (60 sec per tree x 10 trees). Approximately equal time was spent on both sides of the tree.                                                         |
| apple        | PA    | 2013, 2014       | 5     | 32        | 1                            | 1                           | 10 min (60 sec per tree x 10 trees). Approximately equal time was spent on both sides of the tree.                                                         |
| blueberry    | BC    | 2013, 2014, 2015 | 17    | 177       | 3                            | 1                           | 10 min (20 bushes along transect, 1 side each). Observers walked along the row, observing only the facing half of each bush.                               |
| blueberry    | MI    | 2013, 2014, 2015 | 17    | 188       | 3                            | 1                           | 10 min (20 bushes along transect, 1 side each). Observers walked along the row, observing only the facing half of each bush.                               |
| blueberry    | OR    | 2014, 2015       | 6     | 45        | 3                            | 1                           | 10 min (20 bushes along transect, 1 side each). Observers walked along the row, observing only the facing half of each bush.                               |
| blueberry    | FL    | 2014, 2015       | 12    | 47        | 3                            | 1                           | 10 min (20 bushes along transect, 1 side each). Observers walked along the row, observing only the facing half of each bush.                               |
| tart cherry  | MI    | 2013, 2014, 2015 | 5     | 58        | 1                            | 1                           | 10 min (60 sec per tree x 10 trees). Approximately equal time was spent on both sides of the tree.                                                         |
| tart cherry  | PA    | 2015             | 4     | 16        | 1                            | 1                           | 10 min (60 sec per tree x 10 trees). Approximately equal time was spent on both sides of the tree.                                                         |
| sweet cherry | WA    | 2013, 2014, 2015 | 11    | 56        | 3                            | 1                           | 10 min (60 sec per tree x 10 trees). Approximately equal time was spent on both sides of the tree.                                                         |
| pumpkin      | PA    | 2013, 2014, 2015 | 13    | 49        | 3                            | 2                           | 22.5 min (45 sec x 30 replicates per transect). Each replicate was a patch of flowers small enough to be observed from one location.                       |
| watermelon   | CA    | 2013, 2014, 2015 | 17    | 68        | 2                            | 2                           | 16.7 min (25 sec x 40 replicates per transect). Each replicate was a patch of flowers small enough to be observed from one location.                       |
| watermelon   | FL    | 2013, 2014, 2015 | 19    | 80        | 2                            | 2                           | 16.7 min (25 sec x 40 replicates per transect). Each replicate was a patch of flowers small enough to be observed from one location.                       |

**Table S4.** Methods details for yield or production measurements of each crop.

| crop         | state | crop production variable              | replicate unit                                                         |
|--------------|-------|---------------------------------------|------------------------------------------------------------------------|
| almond       | CA    | number of fruit per flower            | 5 trees sampled per transect                                           |
| apple        | MI    | number of fruit per branch*           | 10 trees per transect (1 branch sampled per tree)                      |
| apple        | PA    | number of fruit per branch*           | 2-50 (mean 16) trees per transect (1 branch sampled per tree)          |
| blueberry    | BC    | fruit weight (per berry, open-bagged) | 10 bushes per transect (1 bagged and unbagged branch sampled per bush) |
| blueberry    | MI    | fruit weight (per berry, open-bagged) | 10 bushes per transect (1 bagged and unbagged branch sampled per bush) |
| blueberry    | OR    | fruit weight (per berry, open-bagged) | 10 bushes per transect (1 bagged and unbagged branch sampled per bush) |
| blueberry    | FL    | fruit weight (per berry, open-bagged) | 10 bushes per transect (1 bagged and unbagged branch sampled per bush) |
| tart cherry  | MI    | number of fruit per flower            | 10 trees per transect (1 branch sampled per tree)                      |
| tart cherry  | PA    | number of fruit per flower            | 10 trees per transect (1 branch sampled per tree)                      |
| sweet cherry | WA    | fruit weight per branch               | 10 trees per transect (1 branch sampled per tree)                      |
| pumpkin      | PA    | fruit weight per area                 | 5 (2013), 20 (2014-15) quadrats per transect (1 sq m each)             |
| watermelon   | CA    | fruit weight per area                 | 20 quadrats per transect (2.25 sq m each)                              |
| watermelon   | FL    | fruit weight per area                 | 10 (2013), 20 (2014-15) quadrats per transect (2.25 sq m each)         |

\*Note: for apple, we additionally explored models that included branch cross-sectional area to control for the possibility that larger branches could produce more fruit. However, the orchards we sampled were of similar cross-sectional area, thus the additional variable was not retained by AIC selection.

**Table S5.** Percent of national gross production value represented by the states sampled in this study (average of 2013-2015 production values). States that are often the top state in terms of national value are marked with an asterisk. In the case of apple, our data rely on estimates from Michigan and Pennsylvania, which both contain important apple producing regions (see Fig. S1), but sum to only about 10% of national value. However our estimates of honey bee and wild bee visitation rates for apple match very well with literature estimates from New York, which is a higher-value state (Park et al. 2016). Similarly, pumpkin is grown widely across the USA, while our data for this crop come only from Pennsylvania. Although it is reasonable to expect that there may be regional differences in pollination that our analysis will not incorporate, our data nevertheless represent the best information currently available.

| Crop         | States sampled             | Percent of National Value |
|--------------|----------------------------|---------------------------|
| Almond       | California*                | 100.0                     |
| Tart Cherry  | Michigan*, Pennsylvania    | 67.0                      |
| Sweet Cherry | Washington*                | 57.6                      |
| Blueberry    | Florida, Michigan*, Oregon | 48.2                      |
| Watermelon   | Florida*, California       | 39.7                      |
| Pumpkin      | Pennsylvania               | 12.0                      |
| Apple        | Michigan, Pennsylvania     | 10.2                      |

**Table S6.** Pollinator limitation analysis model results (part 1). Yield or crop production variables used in the models, best model as chosen by AIC, breakpoint (if segmented model was chosen), and estimated percent of transects that were pollination limited are listed for each model.

| crop         | state | variable                             | best model      | segmented<br>breakpoint | percent<br>limited |
|--------------|-------|--------------------------------------|-----------------|-------------------------|--------------------|
| almond       | CA    | number of fruit per flower           | linear negative | NA                      | 0                  |
| apple        | MI    | number of fruit per branch           | linear positive | NA                      | 100                |
| apple        | PA    | number of fruit per branch           | linear positive | NA                      | 100                |
| blueberry    | BC    | fruit weight per berry (open-bagged) | segmented       | 26.3                    | 94                 |
| blueberry    | MI    | fruit weight per berry (open-bagged) | segmented       | 26.3                    | 72                 |
| blueberry    | OR    | fruit weight per berry (open-bagged) | segmented       | 26.3                    | 64                 |
| blueberry    | FL    | fruit weight per berry (open-bagged) | flat            | NA                      | 0                  |
| tart cherry  | MI    | number of fruit per flower           | segmented       | 131.0                   | 72                 |
| tart cherry  | PA    | number of fruit per flower           | NA              | NA                      | NA                 |
| sweet cherry | WA    | fruit weight per branch              | segmented       | 7.3                     | 74                 |
| pumpkin      | PA    | fruit weight per area                | flat            | NA                      | 0                  |
| watermelon   | CA    | fruit weight per area                | segmented       | 0.3                     | 9                  |
| watermelon   | FL    | fruit weight per area                | linear negative | NA                      | 0                  |

**Table S7.** Pollinator limitation analysis model results (part 2). AIC values, delta AIC values, and Akaike weights are listed for each model, and the best model for each crop state combination is marked in bold.

| crop                | states            | model                     | AIC          | $\Delta$ AIC | w           |
|---------------------|-------------------|---------------------------|--------------|--------------|-------------|
| almond              | CA                | flat model                | -31.4        | 1.7          | 0.30        |
| <b>almond</b>       | <b>CA</b>         | <b>linear model (neg)</b> | <b>-33.1</b> | <b>0</b>     | <b>0.70</b> |
| almond              | CA                | segmented model           | NA           | NA           | NA          |
| apple               | MI                | flat model                | 350.5        | 5.5          | 0.06        |
| <b>apple</b>        | <b>MI</b>         | <b>linear model (pos)</b> | <b>345</b>   | <b>0</b>     | <b>0.91</b> |
| apple               | MI                | segmented model           | 351.9        | 6.9          | 0.03        |
| apple               | PA                | flat model                | 232.7        | 8.4          | 0.01        |
| <b>apple</b>        | <b>PA</b>         | <b>linear model (pos)</b> | <b>224.3</b> | <b>0</b>     | <b>0.59</b> |
| apple               | PA                | segmented model           | 225.1        | 0.8          | 0.40        |
| blueberry           | MI, OR, BC        | flat model                | 264.7        | 56.3         | 0.00        |
| blueberry           | MI, OR, BC        | linear model (pos)        | 211.1        | 2.7          | 0.21        |
| <b>blueberry</b>    | <b>MI, OR, BC</b> | <b>segmented model</b>    | <b>208.4</b> | <b>0</b>     | <b>0.79</b> |
| <b>blueberry</b>    | <b>FL</b>         | <b>flat model</b>         | <b>39.2</b>  | <b>0</b>     | <b>0.68</b> |
| blueberry           | FL                | linear model (neg)        | 40.7         | 1.5          | 0.32        |
| blueberry           | FL                | segmented model           | NA           | NA           | NA          |
| tart cherry         | MI                | flat model                | -86.1        | 4.8          | 0.05        |
| tart cherry         | MI                | linear model (pos)        | -90.5        | 0.4          | 0.43        |
| <b>tart cherry</b>  | <b>MI</b>         | <b>segmented model</b>    | <b>-90.9</b> | <b>0</b>     | <b>0.52</b> |
| sweet cherry        | WA                | flat model                | 353.6        | 8.7          | 0.01        |
| sweet cherry        | WA                | linear model (pos)        | 354.6        | 9.7          | 0.01        |
| <b>sweet cherry</b> | <b>WA</b>         | <b>segmented model</b>    | <b>344.9</b> | <b>0</b>     | <b>0.98</b> |
| <b>pumpkin</b>      | <b>PA</b>         | <b>flat model</b>         | <b>352.3</b> | <b>0</b>     | <b>0.48</b> |
| pumpkin             | PA                | linear model (pos)        | 352.7        | 0.4          | 0.39        |
| pumpkin             | PA                | segmented model           | 354.9        | 2.6          | 0.13        |
| watermelon          | CA                | flat model                | 432.6        | 1.7          | 0.27        |
| watermelon          | CA                | linear model (pos)        | 434.3        | 3.4          | 0.11        |
| <b>watermelon</b>   | <b>CA</b>         | <b>segmented model</b>    | <b>430.9</b> | <b>0</b>     | <b>0.62</b> |
| watermelon          | FL                | flat model                | 338.3        | 6.2          | 0.00        |
| <b>watermelon</b>   | <b>FL</b>         | <b>linear model (neg)</b> | <b>332.1</b> | <b>0</b>     | <b>1.00</b> |
| watermelon          | FL                | segmented model           | NA           | NA           | NA          |

**Table S8.** Variable input costs per acre (in USD) for each crop-state used in our value analysis, and reference for best-available local extension publication from which cost estimates were calculated.

| crop         | state | Variable input<br>cost per acre<br>(USD) | reference                                                   | notes                                                                | % of gross<br>production<br>value |
|--------------|-------|------------------------------------------|-------------------------------------------------------------|----------------------------------------------------------------------|-----------------------------------|
| cherry_tart  | MI    | \$2080                                   | Penn State Cooperative<br>Extension (2014)                  | variable costs                                                       | 88%                               |
| cherry_tart  | PA    | \$2080                                   | Penn State Cooperative<br>Extension (2014)                  | variable costs                                                       | 73%                               |
| cherry_sweet | WA    | \$6495                                   | Washington State<br>University Extension<br>(2007)          |                                                                      | 49%                               |
| watermelon   | CA    | \$6885                                   | University of California<br>Cooperative Extension<br>(2004) | all costs minus<br>land prep                                         | 86%                               |
| watermelon   | FL    | \$2759                                   | Clemson University<br>Extension (2009)                      | variable costs                                                       | 51%                               |
| blueberry    | MI    | \$7420                                   | Penn State Cooperative<br>Extension (2014)                  | variable costs                                                       | 86%                               |
| blueberry    | OR    | \$6052                                   | Oregon State University<br>Extension Service (2011)         | variable costs<br>for machine<br>harvest                             | 43%                               |
| blueberry    | FL    | \$8017                                   | University of Georgia<br>Cooperative Extension<br>(2004)    | total variable +<br>harvesting and<br>marketing                      | 45%                               |
| apple        | MI    | \$3794                                   | Penn State Cooperative<br>Extension (2014)                  | 60 40<br>processing vs<br>fresh market<br>(different input<br>costs) | 56%                               |
| apple        | PA    | \$3794                                   | Penn State Cooperative<br>Extension (2014)                  | 60 40<br>processing vs<br>fresh market<br>(different input<br>costs) | 82%                               |
| almond       | CA    | \$2151                                   | University of California<br>Cooperative Extension<br>(2011) | total operating<br>costs                                             | 29%                               |
| pumpkin      | PA    | \$1672                                   | Penn State Cooperative<br>Extension (2000)                  |                                                                      | 62%                               |

**Table S9.** A comparison of the fraction of blueberry transects below the estimated breakpoint for pollinator/pollen limitation in the main analysis and hand-pollination analysis (see Supplementary analysis 2). For Florida blueberry, the no relationship model was preferred by AIC, so we do not apply the breakpoint model and therefore estimate 0% (i.e. no limitation).

| blueberry region | main analysis (open-bagged) | hand analysis (hand-open) |
|------------------|-----------------------------|---------------------------|
| British Columbia | 0.94                        | 0.88                      |
| Michigan         | 0.72                        | 0.42                      |
| Oregon           | 0.64                        | 0.22                      |
| Florida          | 0 / NA                      | 0 / NA                    |

**Table S10.** Percentages of agricultural and natural landcover within various radii of the study farms. Within each crop system, values are mean percentages across study farms calculated using the 2016 National Landcover Dataset (Homer et al. 2020).

| crop            | percent agriculture |      |      |       | percent natural |      |      |       |
|-----------------|---------------------|------|------|-------|-----------------|------|------|-------|
|                 | 1 km                | 3 km | 5 km | 10 km | 1 km            | 3 km | 5 km | 10 km |
| almond_ca       | 80                  | 80   | 73   | 67    | 16              | 17   | 22   | 26    |
| apple_mi        | 67                  | 61   | 55   | 49    | 29              | 34   | 38   | 43    |
| apple_pa        | 45                  | 35   | 35   | 32    | 47              | 58   | 57   | 60    |
| blueberry_fl    | 35                  | 25   | 21   | 21    | 60              | 69   | 73   | 71    |
| blueberry_mi    | 41                  | 30   | 29   | 32    | 48              | 55   | 54   | 50    |
| blueberry_or    | 84                  | 77   | 75   | 71    | 9               | 14   | 13   | 13    |
| cherry_sweet_wa | 13                  | 18   | 14   | 10    | 81              | 74   | 78   | 76    |
| cherry_tart_mi  | 66                  | 56   | 50   | 45    | 28              | 36   | 42   | 47    |
| cherry_tart_pa  | 64                  | 55   | 50   | 40    | 24              | 34   | 40   | 51    |
| pumpkin_pa      | 52                  | 44   | 44   | 41    | 39              | 47   | 47   | 49    |
| watermelon_ca   | 92                  | 84   | 81   | 72    | 3               | 9    | 13   | 20    |
| watermelon_fl   | 58                  | 50   | 46   | 39    | 36              | 41   | 46   | 52    |

**Table S11.** (separate .xlsx file) Economic value estimates associated with Analysis 3 and Supplementary analysis 1. Quantities referenced by each equation (equations S3-S8) within the economic value analyses are listed with their associated crop and state. These estimates were used to produce Fig. 4 and Fig. S5.
